# Supplementary figures and images for: A validated method for the rapid quantification of melatonin in over-the-counter hypnotics by the atmospheric pressure solid analysis probe (ASAP)
Source: Royal Society of Chemistry journal article supplement (doi:10.1039/d2ay00352j), 2022-01-01

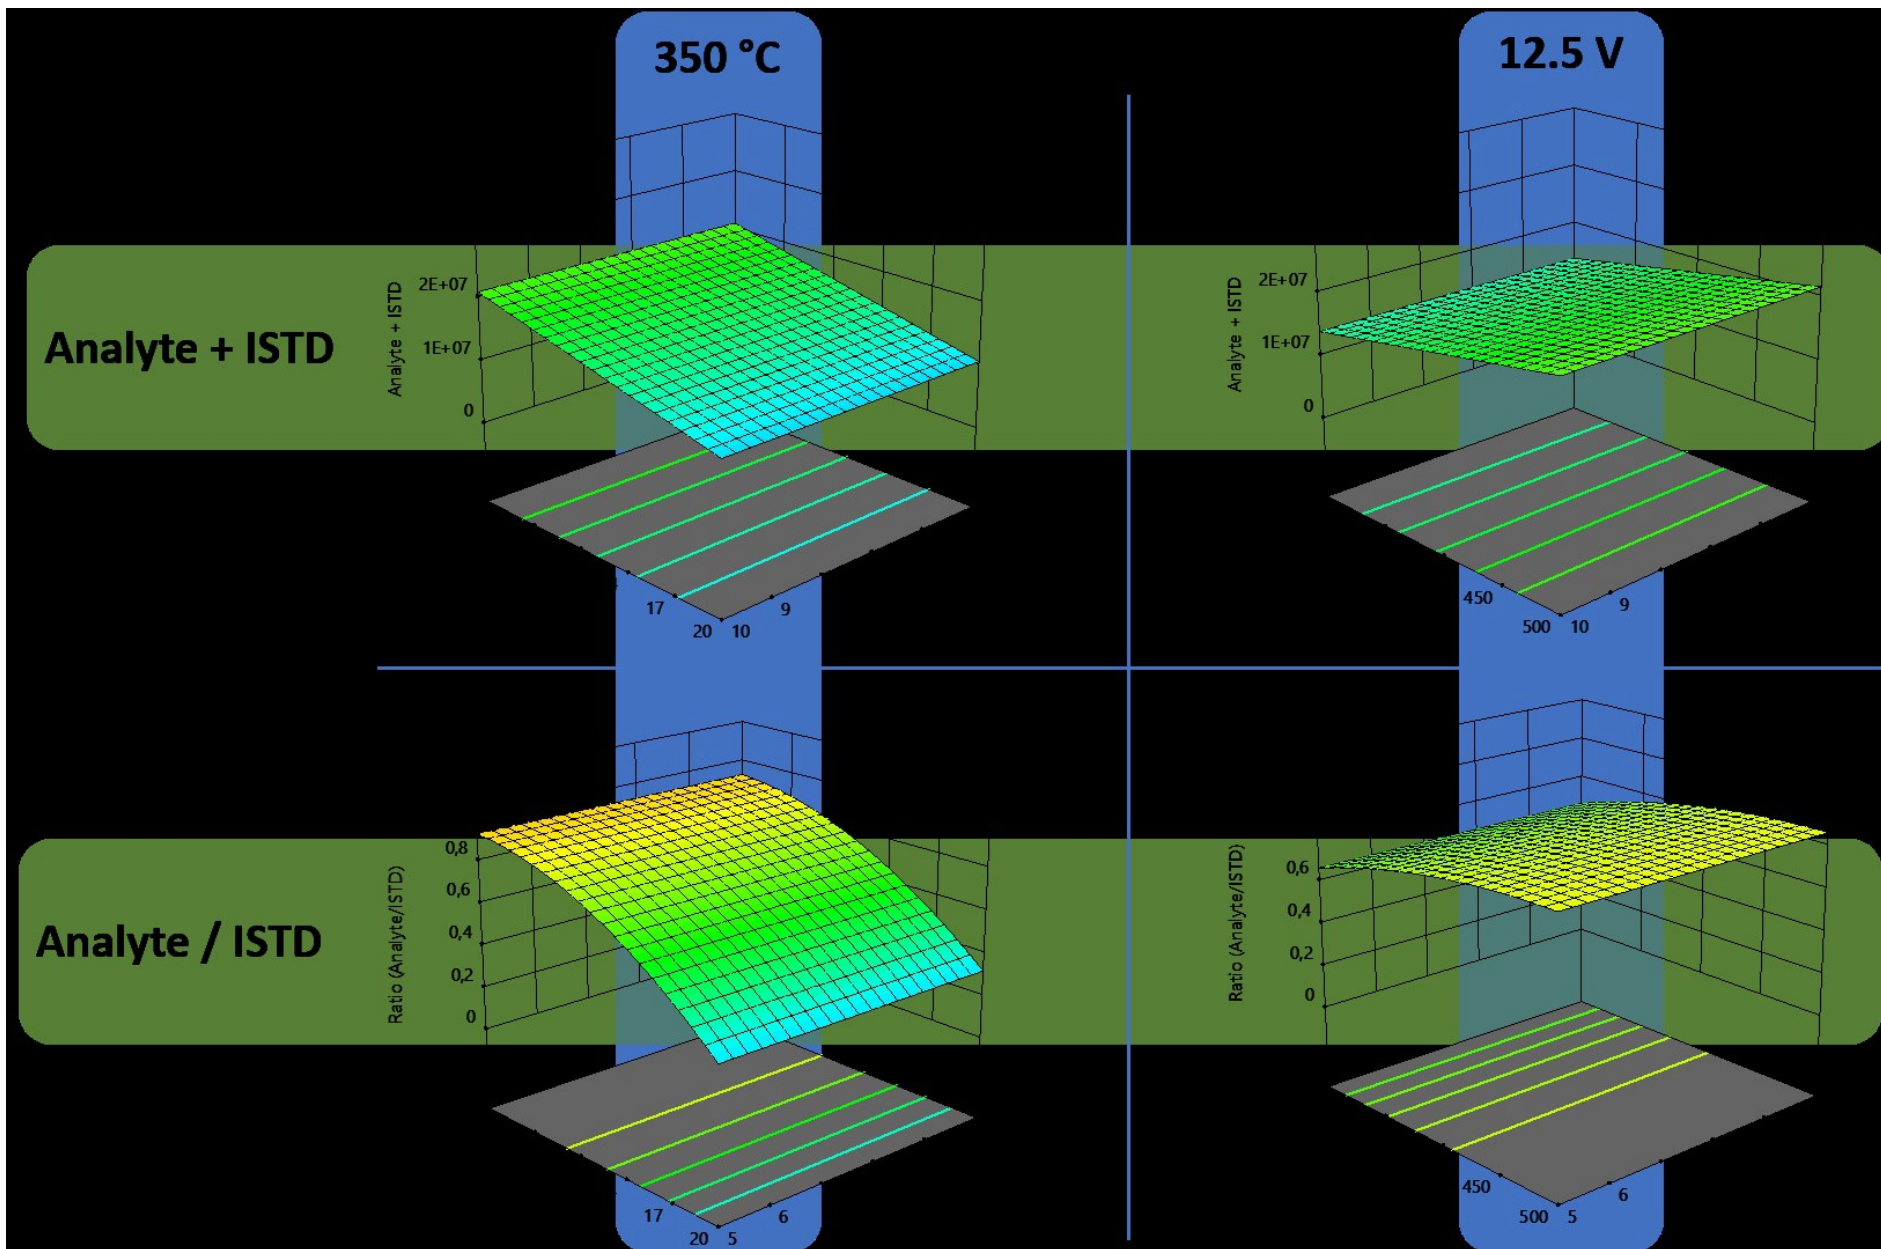

Supplement: d2ay00352j1.pdf [file d2ay00352j1.pdf]

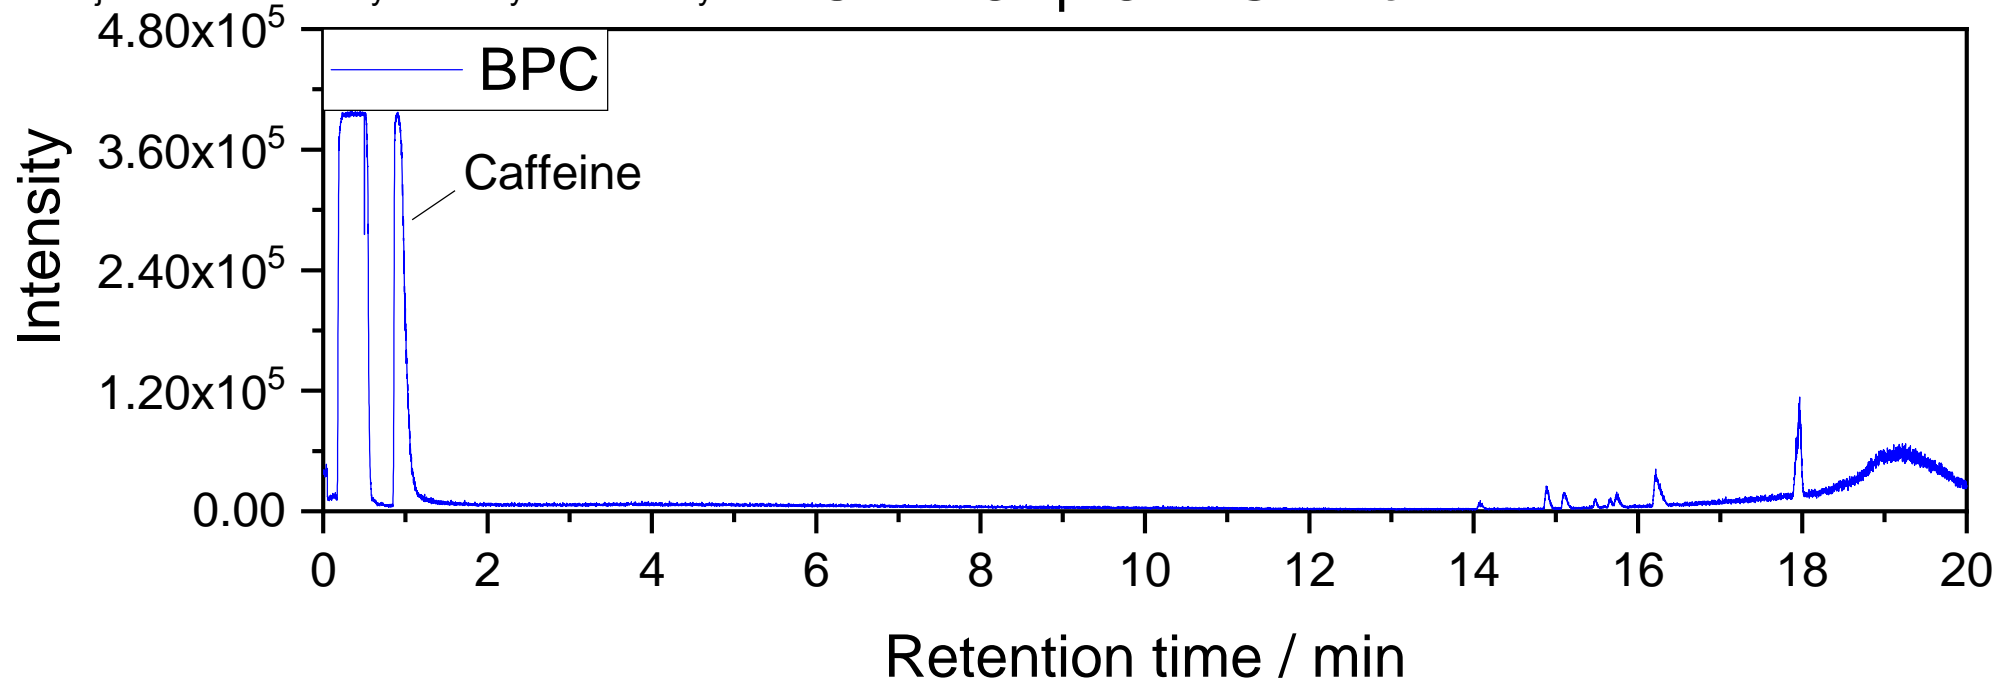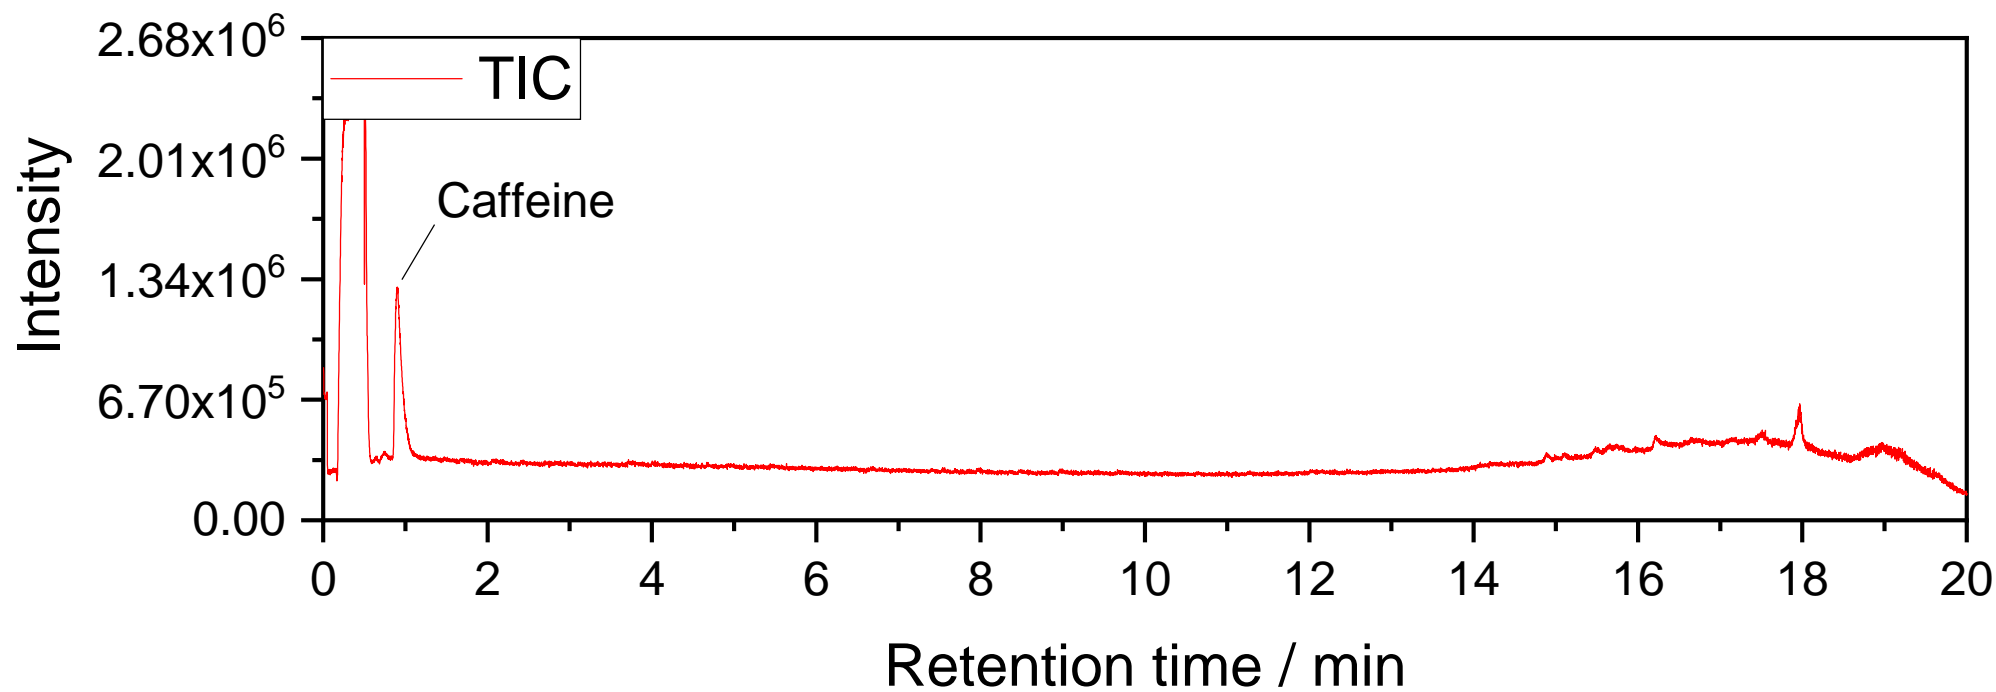

Supplement: d2ay00352j2.pdf [file d2ay00352j2.pdf]

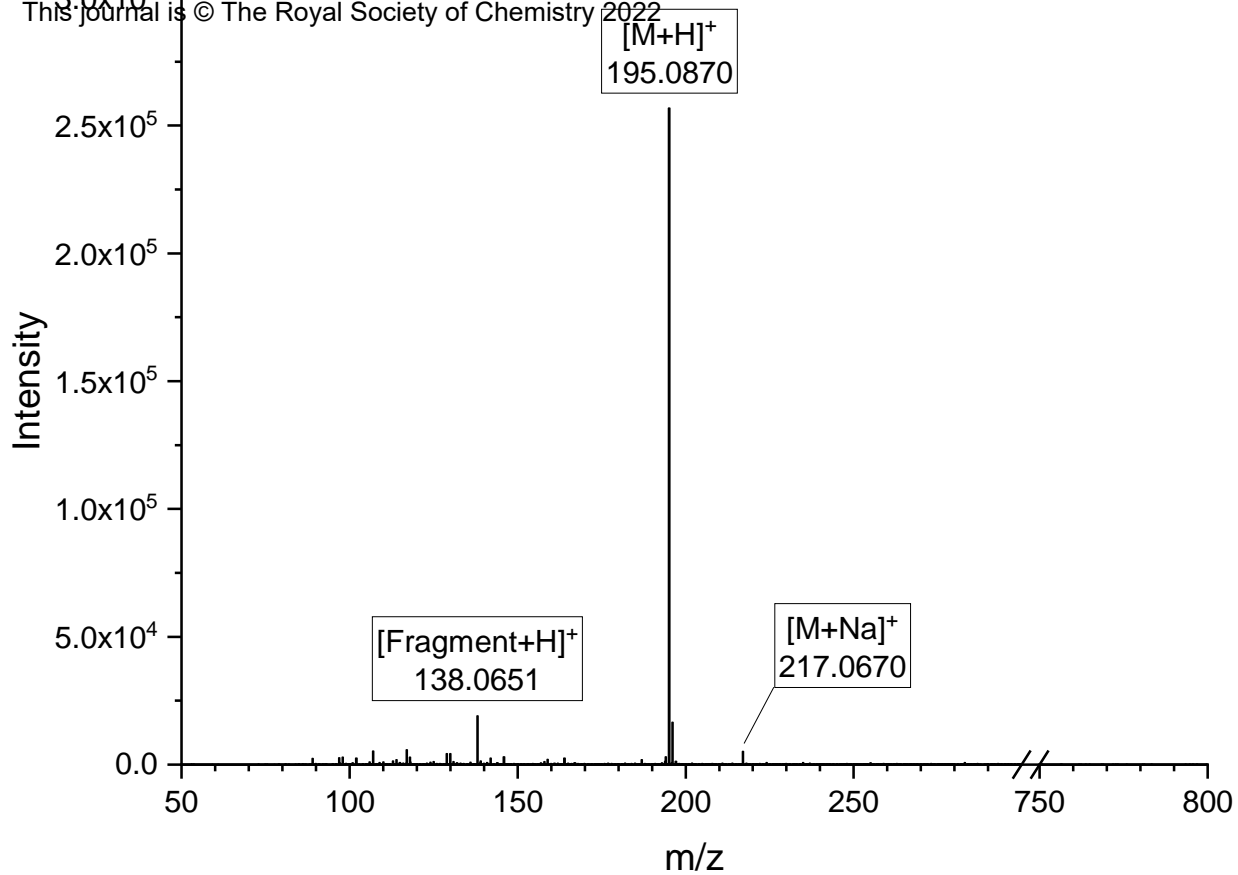

## Caffeine

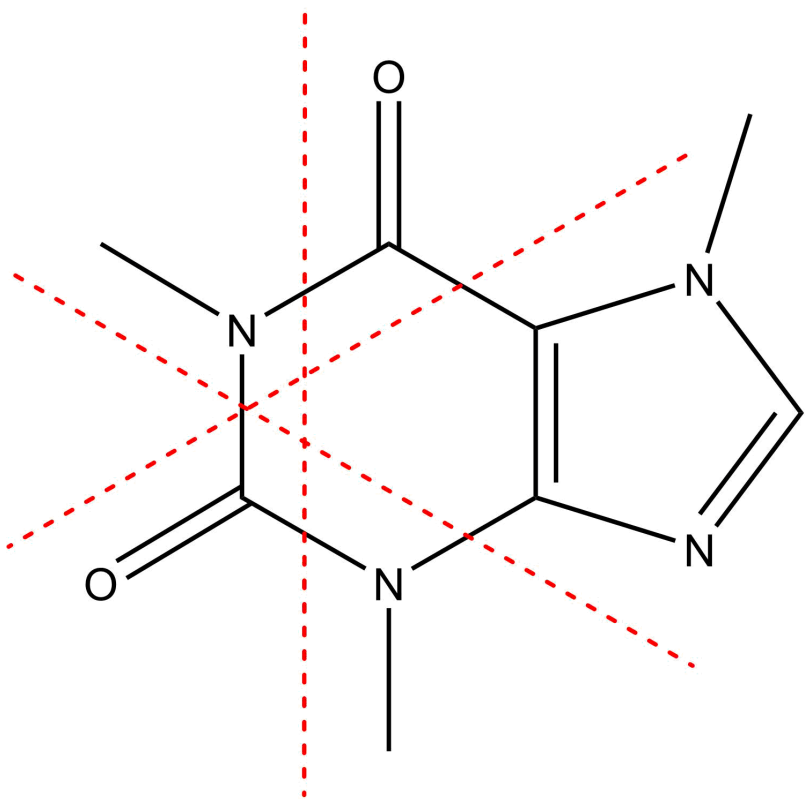

Supplement: d2ay00352j3.pdf [file d2ay00352j3.pdf]

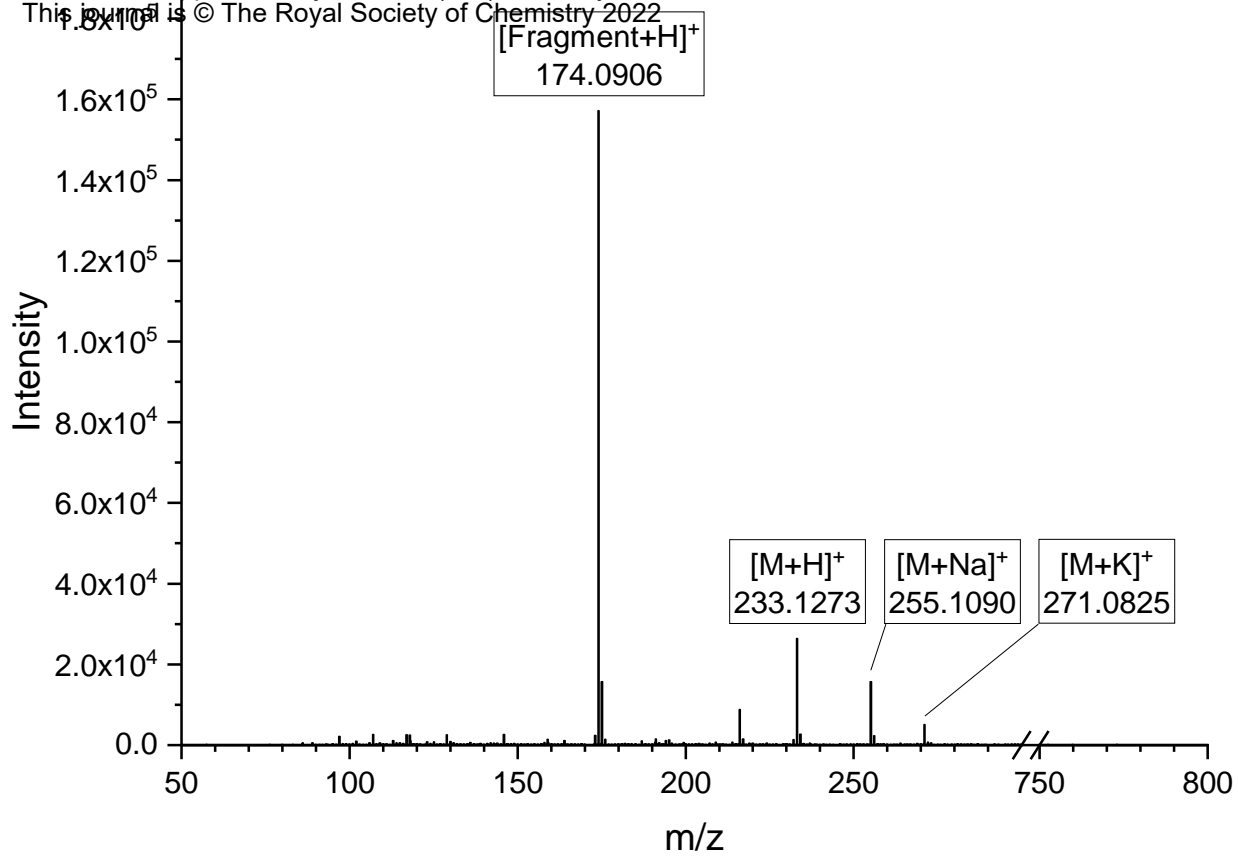

# Melatonin

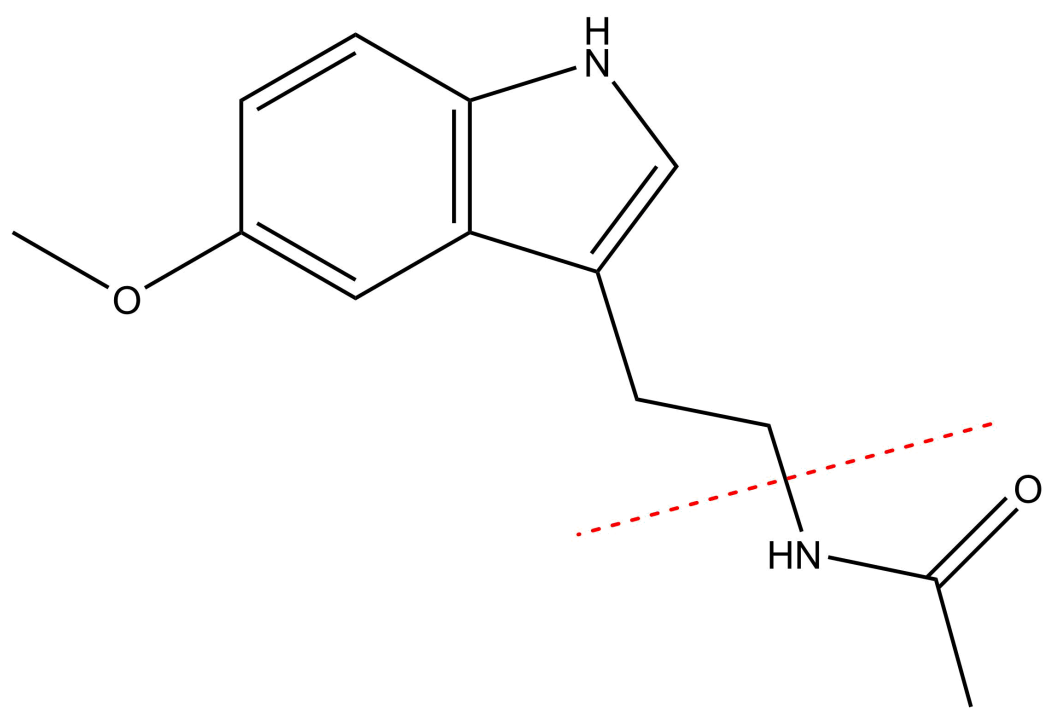

Supplement: d2ay00352j4.pdf [file d2ay00352j4.pdf]

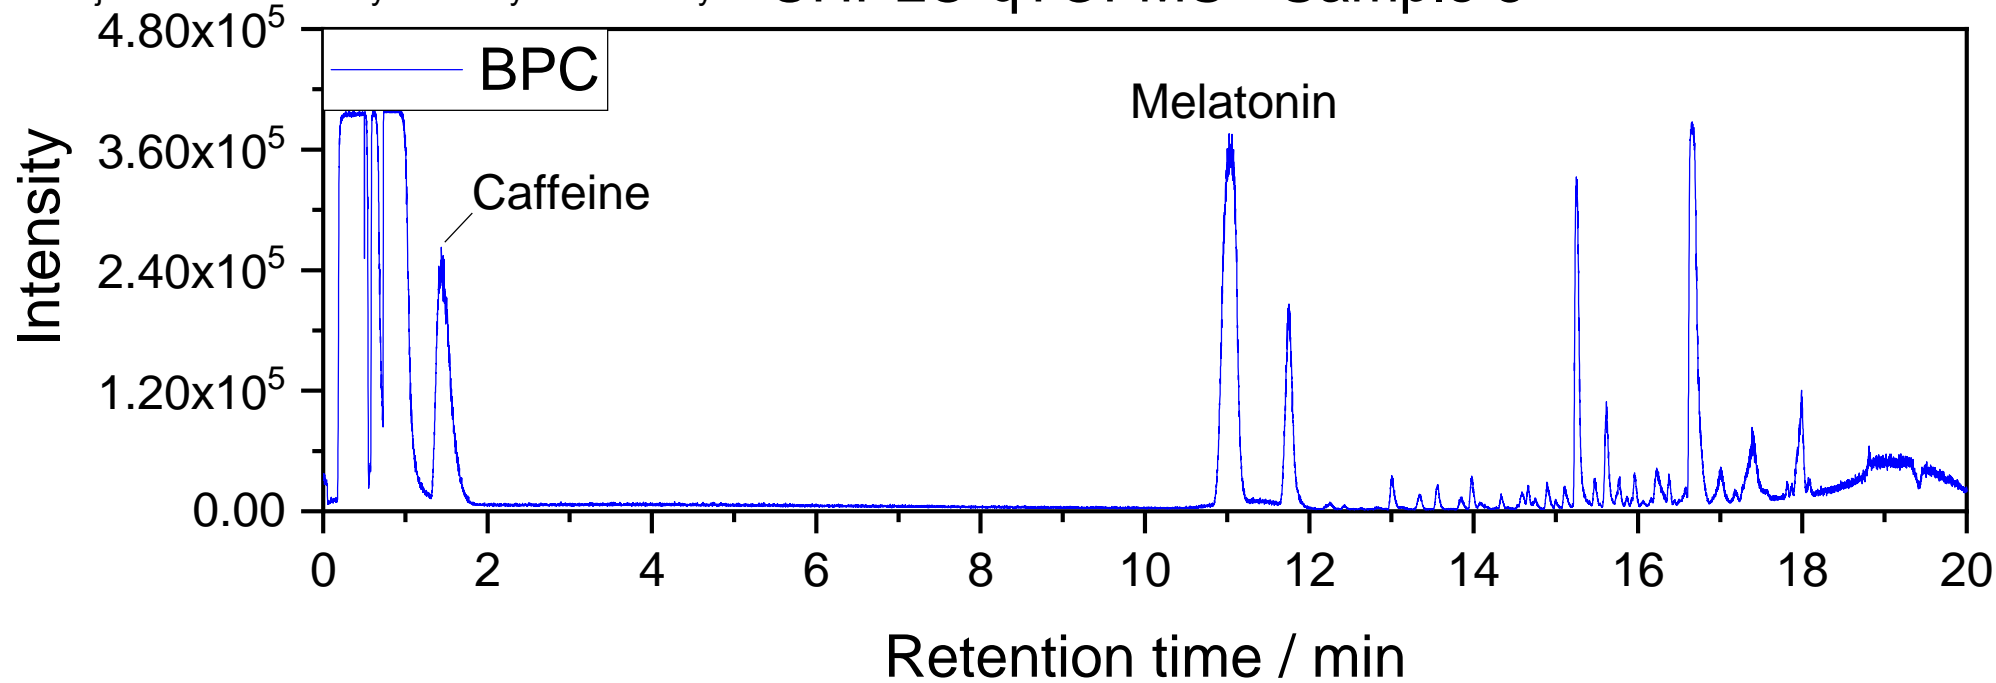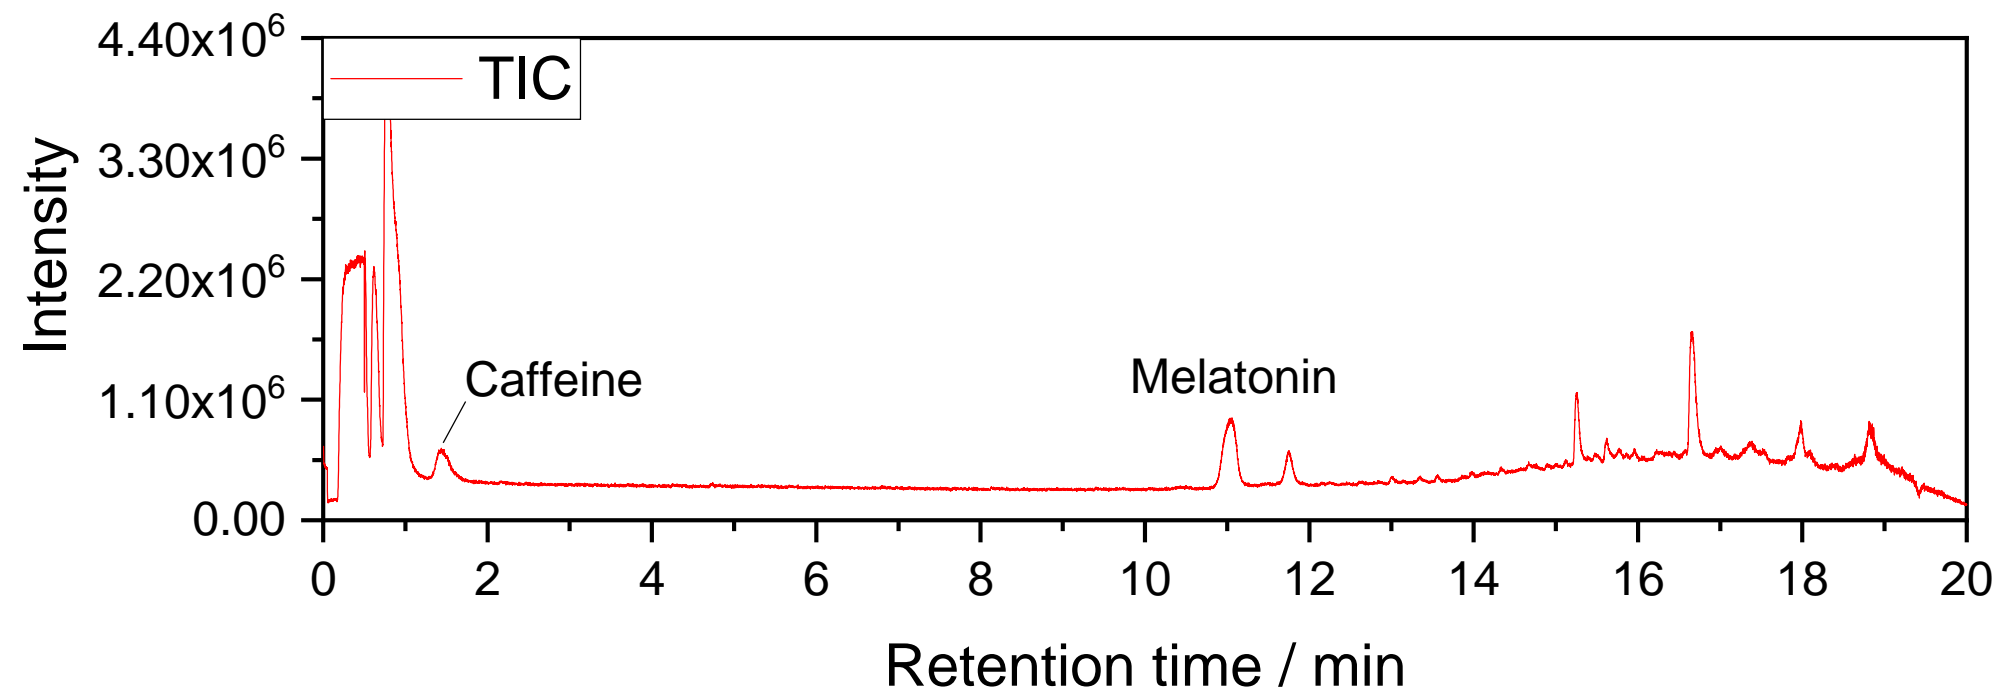

Supplement: d2ay00352j5.pdf [file d2ay00352j5.pdf]

# UHPLC-qTOFMS - Standard 2 ppm

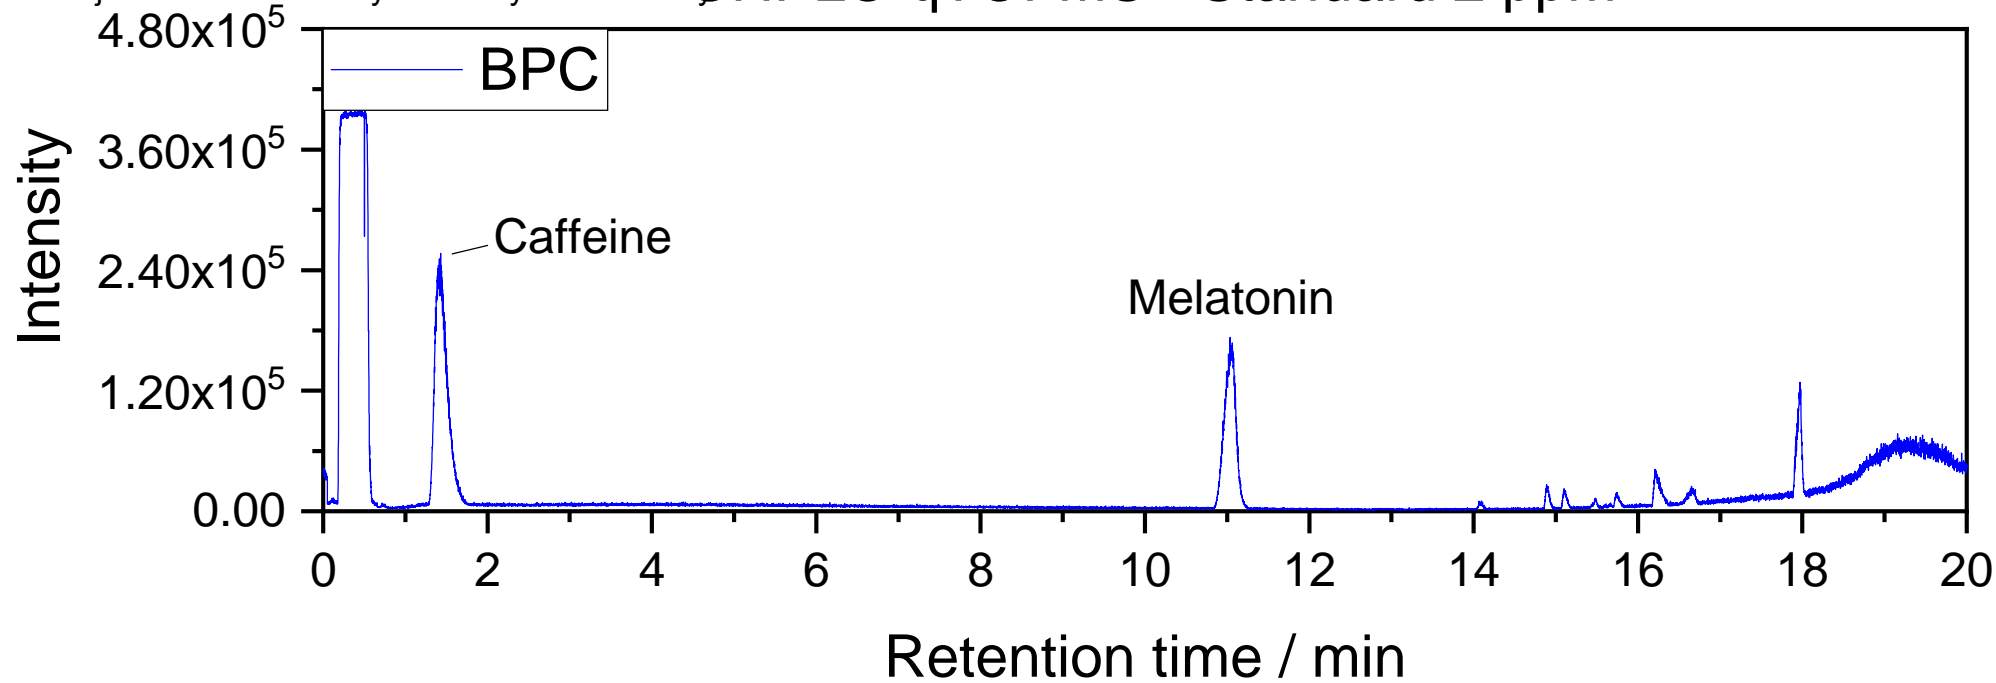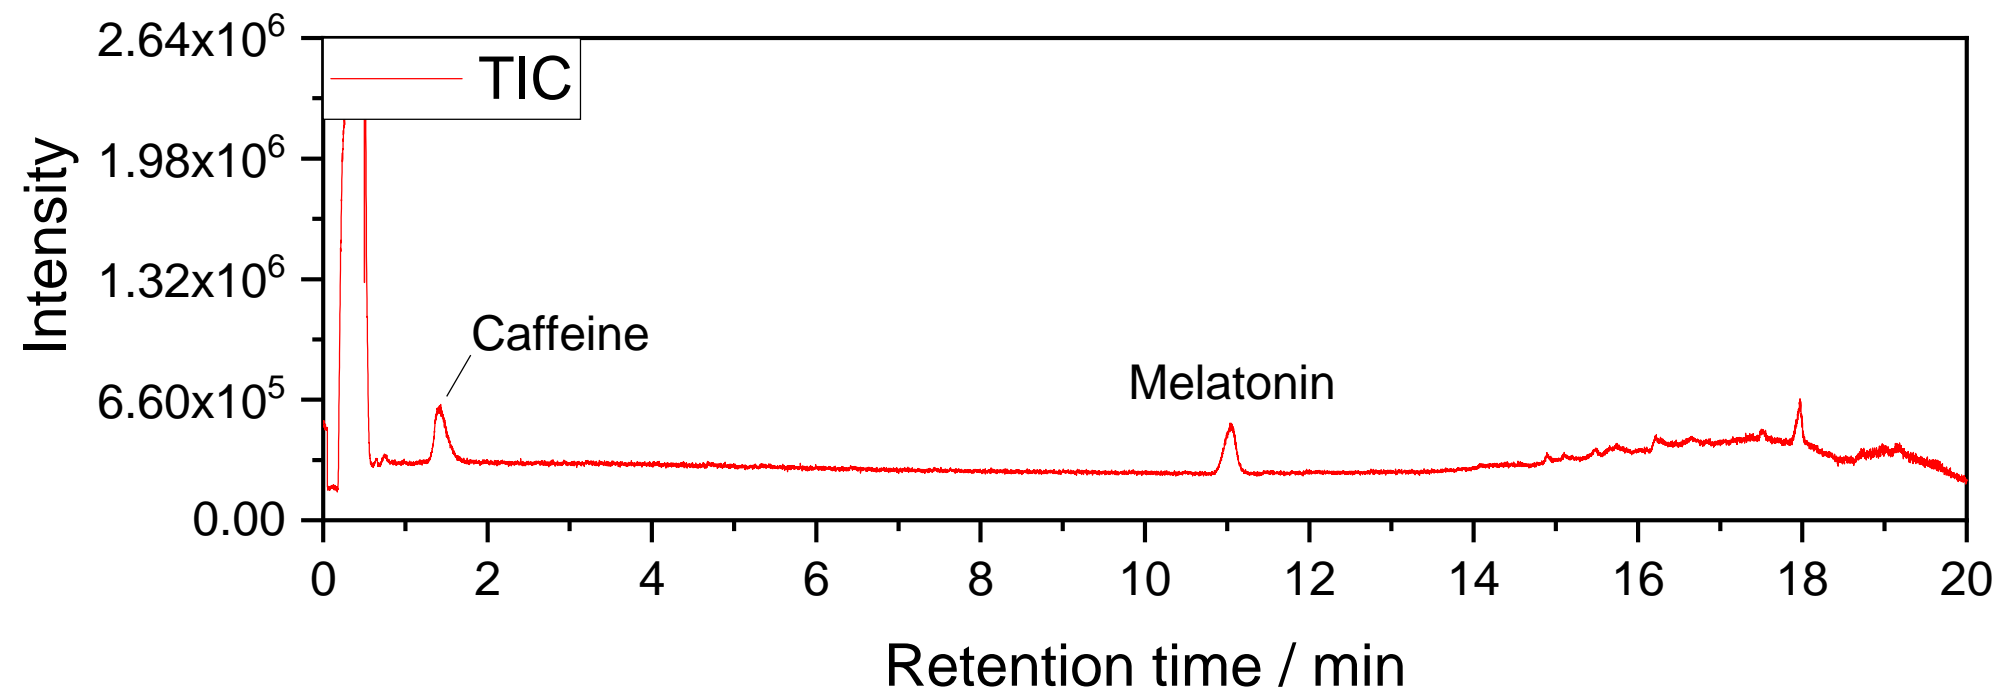

Supplement: d2ay00352j6.pdf [file d2ay00352j6.pdf]
